# Supplementary material
Source: HighWire-hosted journal article supplement (https://molpharm.aspetjournals.org/highwire/filestream/77060/field_highwire_adjunct_files/0/SUPPLEMENTAL_revised_v2.pdf)
Supplement: SUPPLEMENTAL_revised_v2.pdf [file SUPPLEMENTAL_revised_v2.pdf]

## Molecular Pharmacology

### **Small Molecule Allosteric Modulation of the Glucagon-Like Peptide-1 Receptor Enhances the Insulinotropic Effect of Oxyntomodulin.**

Francis S. Willard, Denise Wootten, Aaron D. Showalter, Emilia E. Savage, James Ficorilli, Thomas B. Farb, Krister Bokvist, Jorge Alsina-Fernandez, Sebastian G. B. Furness, Arthur Christopoulos, Patrick M. Sexton, and Kyle W. Sloop

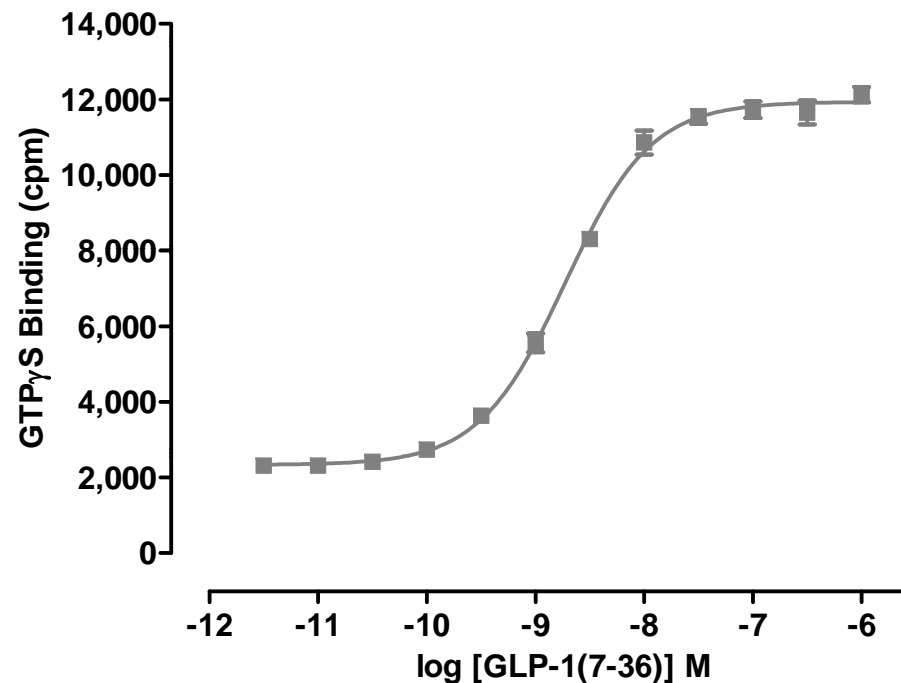

#### **Supplementary Figure 1**

Ligand mediated [ $^{35}$ S]GTP $\gamma$ S binding to endogenous  $G\alpha_s$  protein in GLP-1 receptor expressing membranes is measured by antibody capture scintillation proximity. Saturating GLP-1 concentrations induced a 5.2-fold increase in GTP $\gamma$ S binding as measured in raw cpm values. Data are fit to the four parameter logistic equation.  $EC_{50}$  of GLP-1 (7-36)NH $_2$  was 1.9 nM. Data are the mean  $\pm$  S.E.M. of a single experiment conducted in triplicate and are representative of three independent experiments.

## Molecular Pharmacology

### **Small Molecule Allosteric Modulation of the Glucagon-Like Peptide-1 Receptor Enhances the Insulinotropic Effect of Oxyntomodulin.**

Francis S. Willard, Denise Wootten, Aaron D. Showalter, Emilia E. Savage, James Ficorilli, Thomas B. Farb, Krister Bokvist, Jorge Alsina-Fernandez, Sebastian G. B. Furness, Arthur Christopoulos, Patrick M. Sexton, and Kyle W. Sloop

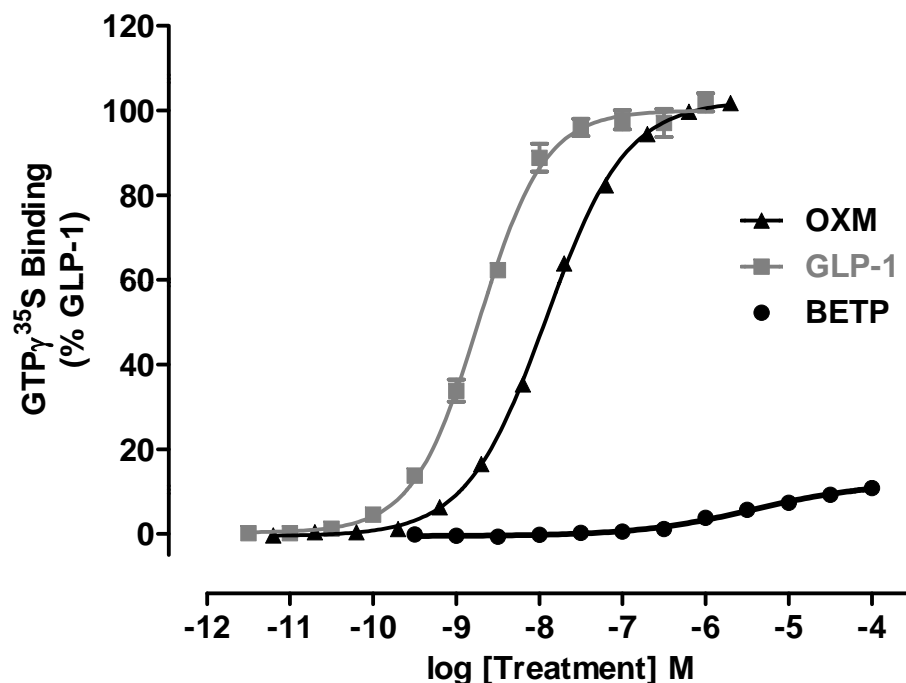

#### **Supplementary Figure 2**

Intrinsic efficacy of BETP, oxyntomodulin (OXM), and GLP-1 (7–36)NH<sub>2</sub> for G protein activation. Ligand mediated [<sup>35</sup>S]GTP $\gamma$ S binding to endogenous G $\alpha_s$  protein in GLP-1 receptor expressing membranes is measured by antibody capture scintillation proximity. Data are normalized to control values measured from saturating GLP-1 (7–36)NH<sub>2</sub> concentrations. Data are fit to the four parameter logistic equation. EC<sub>50</sub> and E<sub>MAX</sub> values (% of maximal GLP-1 (7–36)NH<sub>2</sub> effect): BETP, 3.7  $\mu$ M, 12%; OXM, 12 nM, 103%; GLP-1 (7–36)NH<sub>2</sub>, 1.9 nM, 100 %. Data are the mean  $\pm$  S.E.M. of a single experiment conducted in triplicate and are representative of three independent experiments.

## Molecular Pharmacology

### **Small Molecule Allosteric Modulation of the Glucagon-Like Peptide-1 Receptor Enhances the Insulinotropic Effect of Oxyntomodulin.**

Francis S. Willard, Denise Wootten, Aaron D. Showalter, Emilia E. Savage, James Ficorilli, Thomas B. Farb, Krister Bokvist, Jorge Alsina-Fernandez, Sebastian G. B. Furness, Arthur Christopoulos, Patrick M. Sexton, and Kyle W. Sloop

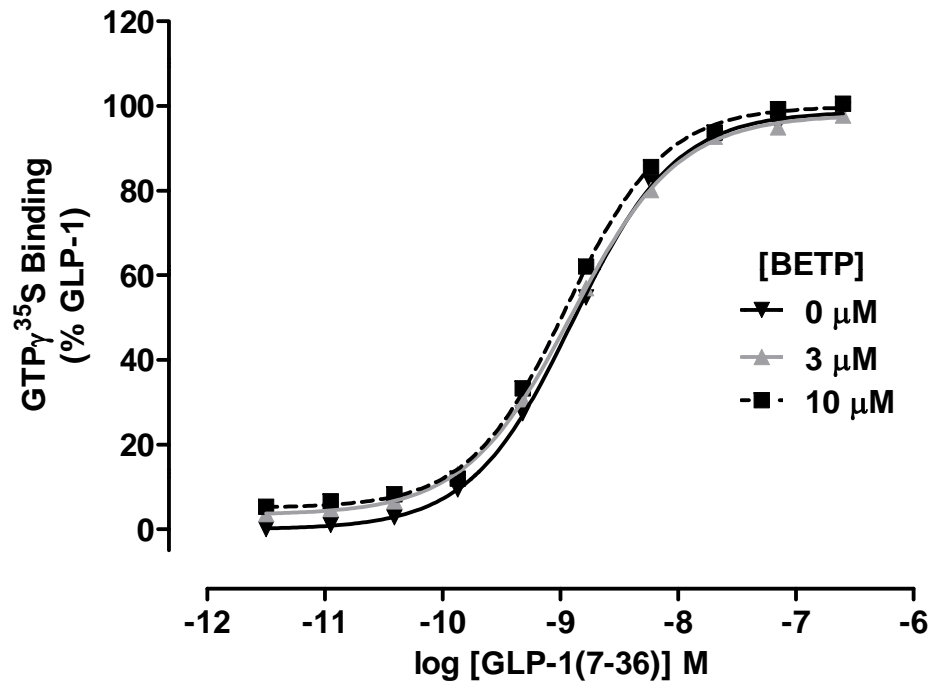

#### **Supplementary Figure 3**

The effect of BETP on GLP-1 (7–36)NH<sub>2</sub> mediated G protein activation. Ligand mediated [<sup>35</sup>S]GTP<sub>γ</sub>S binding to endogenous Gα<sub>s</sub> protein in GLP-1 receptor expressing membranes is measured by antibody capture scintillation proximity. Data are normalized to control values measured from saturating GLP-1 (7–36)NH<sub>2</sub> concentrations. Data are fit to the four parameter logistic equation. EC<sub>50</sub> and E<sub>MAX</sub> values (% of maximal GLP-1 (7–36)NH<sub>2</sub> effect): 0 μM BETP, 1.3 nM, 99%; 3 μM BETP, 1.3 nM, 95%; 10 μM 1.1 nM, 95 %. Data are the mean ± S.E.M. of a single experiment conducted in triplicate and are representative of three independent experiments.

## Molecular Pharmacology

### **Small Molecule Allosteric Modulation of the Glucagon-Like Peptide-1 Receptor Enhances the Insulinotropic Effect of Oxyntomodulin.**

Francis S. Willard, Denise Wootten, Aaron D. Showalter, Emilia E. Savage, James Ficorilli, Thomas B. Farb, Krister Bokvist, Jorge Alsina-Fernandez, Sebastian G. B. Furness, Arthur Christopoulos, Patrick M. Sexton, and Kyle W. Sloop

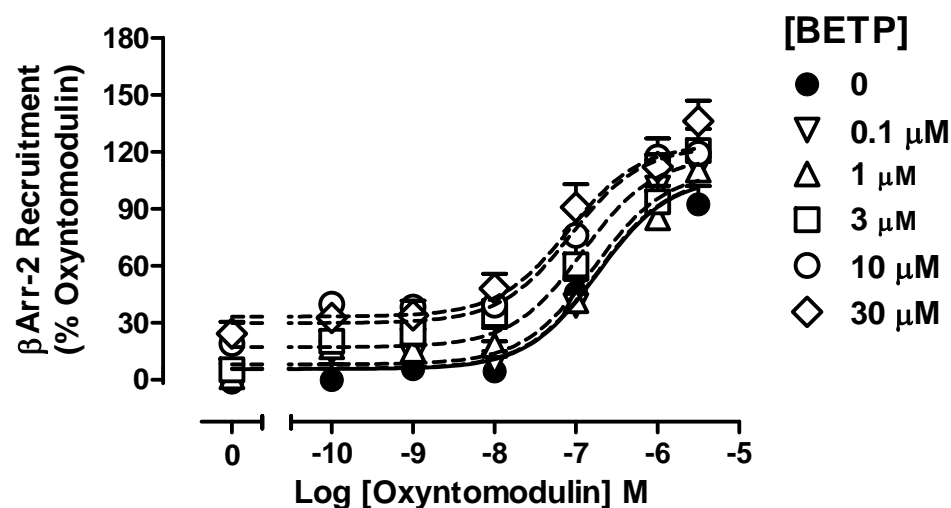

#### **Supplementary Figure 4**

BETP modulation of oxyntomodulin stimulated GLP-1 receptor mediated activation of  $\beta$ -arrestin2. The dose-dependent effects of BETP on oxyntomodulin mediated activation of  $\beta$ -arrestin2 recruitment are measured by bioluminescence resonance energy transfer. Data are fit to the operational model of allosteric agonism to quantify biased signaling; resultant calculated parameters are in Table 1.

## Molecular Pharmacology

### **Small Molecule Allosteric Modulation of the Glucagon-Like Peptide-1 Receptor Enhances the Insulinotropic Effect of Oxyntomodulin.**

Francis S. Willard, Denise Wootten, Aaron D. Showalter, Emilia E. Savage, James Ficorilli, Thomas B. Farb, Krister Bokvist, Jorge Alsina-Fernandez, Sebastian G. B. Furness, Arthur Christopoulos, Patrick M. Sexton, and Kyle W. Sloop

| Assay            | pIC <sub>50</sub> |             | pEC <sub>50</sub> |             | Emax (% GLP-1(7-36)NH <sub>2</sub> ) |         |
|------------------|-------------------|-------------|-------------------|-------------|--------------------------------------|---------|
|                  | - BETP            | + BETP      | - BETP            | + BETP      | - BETP                               | + BETP  |
| Binding          | 7.92 ± 0.10       | 8.82 ± 0.13 | -                 | -           | -                                    | -       |
| GTPγS            | -                 | -           | 7.78 ± 0.03       | 8.40 ± 0.04 | 95 ± 1                               | 100 ± 1 |
| cAMP             | -                 | -           | 8.48 ± 0.07       | 9.44 ± 0.11 | 98 ± 2                               | 94 ± 3  |
| pERK1/2          | -                 | -           | 7.34 ± 0.17       | 6.93 ± 0.17 | 95 ± 8                               | 83 ± 4  |
| Ca <sup>2+</sup> | -                 | -           | 6.34 ± 0.19       | 6.51 ± 0.22 | 105 ± 12                             | 144 ± 9 |
| β-Arr1           | -                 | -           | 7.13 ± 0.16       | 7.48 ± 0.25 | 105 ± 7                              | 147 ± 9 |
| β-Arr2           | -                 | -           | 6.92 ± 0.13       | 7.28 ± 0.18 | 101 ± 6                              | 124 ± 7 |

#### **Supplementary Table 1**

Oxyntomodulin binding and signalling parameters in the absence and presence of 30 μM BETP. Data were analysed using a four parameter logistic equation as defined in materials and methods. pIC<sub>50</sub> values represent the negative logarithm of the concentration of ligand that inhibits binding of half the total concentration of radiolabelled antagonist, <sup>125</sup>I-exendin(9-39). pEC<sub>50</sub> values represent the negative logarithm of the concentration of agonist that produces half the maximal response. Emax values represent the maximal response normalised to that elicited by 100 nM GLP-1(7-36)NH<sub>2</sub>.
